# Supplementary material
Source: PubMed Central journal article supplement (PMC3207702)
Supplement: 1108852108_pnas.1108852108_SI.pdf [file 1108852108_pnas.1108852108_SI.pdf]

# Supporting Information

Surovtseva et al. 10.1073/pnas.1108852108

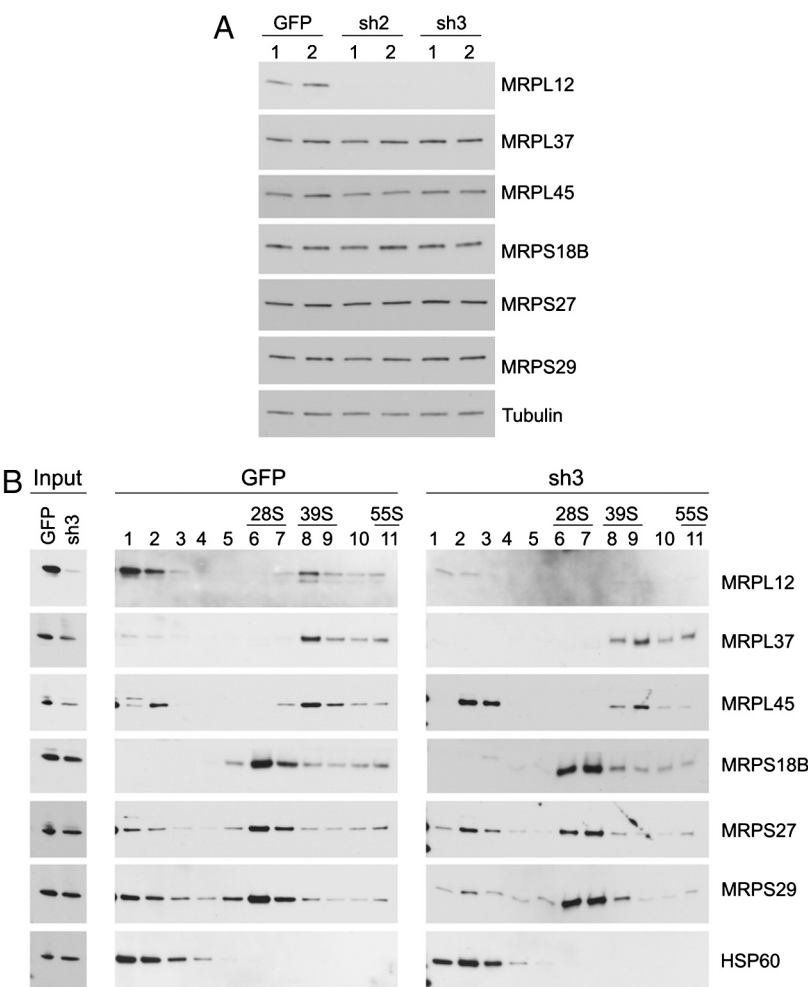

**Fig. S1.** Analysis of mitochondrial ribosomal proteins and ribosome assembly in MRPL12-depleted cells. (A) Steady-state levels of indicated mitochondrial ribosomal proteins. (B) Western blot analysis of 10–30% sucrose gradient density centrifugation fractions. Antibodies used for immunoblotting of input and sucrose gradient fractions are indicated. Fraction numbers are shown, and fractions enriched for small (28S) and large (39S) ribosomal subunits, and assembled mitochondrial ribosomes (55S) are underlined. In both boxes, extracts from MRPL12 knockdown (sh2, 3) and shGFP control HeLa cells were used for analysis.
